# Supplementary material for: Helicobacter pylori infection is associated with elevated galactose-deficient IgA1 in IgA nephropathy
Source: PubMed Central journal article supplement (PMC7946026; doi:10.1080/0886022x.2020.1772295), 2020-06-11
Supplement: IRNF_A_1772295_SM2601.pdf [file IRNF_A_1772295_SM2601.pdf]

**Supplementary Table 1.** Principles of *Helicobacter pylori* infection diagnosis.

---

Types of *H. pylori* infection

---

Uninfected                                      Seronegative for UreA and UreB IgG

Type □ *H. pylori* infection              Seropositive for UreA and/or UreB IgG + CagA and/or VacA IgG

Type □ *H. pylori* infection              Seropositive for UreA and/or UreB IgG + seronegative for CagA and VacA IgG

---

UreA/B: urease A/B; CagA: cytotoxin associated A; VacA: vacuolating cytotoxin A.

**Supplementary Table 2.** Baseline characteristics of patients with IgA nephropathy.

|                                     | IgAN patients<br>(n=261)   |
|-------------------------------------|----------------------------|
| Age, years                          | 37.7±12.3                  |
| Sex, male, <i>n</i> (%)             | 135 (51.7)                 |
| SBP, mmHg                           | 123.5±15.4                 |
| DBP, mmHg                           | 76.4±10.8                  |
| Hypertension, <i>n</i> (%)          | 115 (44.1)                 |
| Gross hematuria, <i>n</i> (%)       | 63 (24.1)                  |
| Microscopic hematuria, <i>n</i> (%) | 224 (85.8)                 |
| Serum IgG, g/L                      | 10.8±3.2                   |
| Serum IgA, g/L                      | 3.3±1.1                    |
| Serum IgM, g/L                      | 1.4±2.6                    |
| Serum C3, g/L                       | 0.9±0.2                    |
| Proteinuria, g/24 h                 | 1.6±2.3                    |
| Scr, µmol/L                         | 140.6±134.2                |
| eGFR, mL/min/1.73m <sup>2</sup>     | 74.4±36.9                  |
| CrCl, mL/min                        | 79.3±41.6                  |
| BUN, µmol/L                         | 7.5±4.9                    |
| Treatment regimes, <i>n</i> (%)     |                            |
| ACE inhibitors or ARBs              | 253 (96.9)                 |
| Immunosuppressive agents            | 82 (31.4)                  |
| Prednisone                          | 91 (34.9)                  |
| Oxford Score, <i>n</i> (%)          |                            |
| M0/1                                | 83/178 (31.8/68.2)         |
| E0/1                                | 170/91 (65.1/34.9)         |
| S0/1                                | 80/181 (30.7/69.3)         |
| T0/1/2                              | 126/113/22 (48.3/43.3/8.4) |
| C0/1/2                              | 216/33/12 (82.8/12.6/4.6)  |

IgAN: IgA nephropathy; SBP: systolic blood pressure; DBP: diastolic blood pressure; Scr: serum creatinine; eGFR: estimated glomerular filtration rate; CrCl: 24-hour creatinine clearance; BUN: blood urea nitrogen; ACE: angiotensin-converting enzyme; ARB: angiotensin II receptor blocker; M: Mesangial hypercellularity; E: Endocapillary proliferation; S: Segmental sclerosis; T: interstitial fibrosis and tubular atrophy; C: Crescents.
